# Supplementary material for: Removal of Interictal MEG-Derived Network Hubs Is Associated With Postoperative Seizure Freedom
Source: Front Neurol. 2020 Sep 24;11:563847. doi: 10.3389/fneur.2020.563847 (PMC7543719; doi:10.3389/fneur.2020.563847)
Supplement: Supplementary file 2 [file Table_1.XLSX]

## Sheet: Sheet3
	Volume (mm3)	998	965	940	934	931	910	874	851	815	805	803	782	1302	1284	1236	1220	1216	1211	1210	1200	1182	1178	1168	1163	1142	1106	1085	1068	1063	1055	1022
	'l.bankssts_1'	2687	3022	2966	2741	3268	4799	3041	2796	2244	3166	3598	2605	2791	2547	4783	2716	3103	3134	2685	3145	3088	2460	2135	3371	2133	2859	2536	2148	2142	2623	2081
	'l.caudalanteriorcingulate_1'	1661	969	1763	2513	1533	1720	1665	1856	1213	1565	2346	1884	1945	1345	2321	2175	1280	1980	1623	2006	1382	1618	1777	1756	1765	3427	2158	1293	1811	1704	1924
	'l.caudalmiddlefrontal_1'	5887	7256	8442	7151	6565	9642	6202	6027	7074	6629	8257	8041	7825	8421	11290	6108	8509	8116	7948	5195	6512	7827	7870	7141	5684	6050	8131	4697	7563	5292	7159
	'l.cuneus_1'	2571	3100	3369	3103	3050	3352	2769	2255	2567	2378	2745	3001	2708	3137	3050	2624	1672	3406	2400	2974	2382	2111	3143	3105	1535	2914	2831	1585	3171	3165	2224
	'l.entorhinal_1'	1052	2258	2078	1254	1555	1307	1689	1893	1774	1809	2615	1352	1887	1979	2889	1754	1574	1975	2456	2766	898	1866	1512	2366	1008	2089	2184	1136	1886	1983	1804
	'l.frontalpole_1'	1008	1026	644	792	580	715	668	958	644	1043	916	674	953	1172	956	1034	539	867	678	1233	451	815	905	524	931	1229	959	755	784	819	1340
	'l.fusiform_1'	4215	4112	4302	5469	5363	5029	4803	3837	3276	5477	4541	4596	5763	5173	5449	5247	3454	5292	5741	4674	2880	4170	4030	3987	3494	5075	4499	3646	5035	3691	3896
	'l.fusiform_2'	4652	5448	5496	5599	5941	5553	4908	3633	4304	4878	5570	5913	5430	5551	7427	5370	5288	5807	5767	5525	3460	4586	5778	5989	3737	6052	5156	4355	4952	4311	5207
	'l.inferiorparietal_1'	5019	4537	3492	5389	5629	5612	4608	3667	5094	3411	4919	5008	5660	4409	7295	6520	7396	6239	5429	4772	4600	4112	4280	4091	4809	5409	5720	3188	5224	3898	5588
	'l.inferiorparietal_2'	7168	6826	6752	9243	7864	9884	7342	5012	6748	7664	9162	7910	7792	7699	9066	6302	8093	7328	8947	6724	6846	7855	5716	6321	6662	7627	6331	5756	8468	6505	6507
	'l.inferiortemporal_1'	5636	4420	5236	5245	8019	4127	5769	3634	2964	4113	6538	7692	4886	5472	8190	5213	9953	6633	5190	6367	4380	5591	5613	6644	4555	4377	4108	4500	4142	4913	6106
	'l.inferiortemporal_2'	6757	5947	5760	7851	6889	6283	5190	4697	4471	4274	5318	6252	4964	6365	8044	5806	7784	7440	4594	5944	4207	5866	5038	6050	5708	5832	6011	4604	6117	3710	7083
	'l.insula_1'	3008	3425	3876	3996	3913	4696	4268	3226	3500	3546	3546	4070	3260	3678	4849	3161	3657	3436	3781	3261	4076	3754	3340	3572	3071	3636	3009	2992	3439	3899	3787
	'l.insula_2'	2521	2978	3519	3144	3212	3686	2849	2677	2975	2771	2539	2951	3088	3241	4538	3033	2813	3274	2938	2702	2204	2745	2430	3170	2293	2933	2923	2289	3218	3241	2548
	'l.isthmuscingulate_1'	1945	2276	2375	2869	2358	1785	1885	1232	2342	2166	1708	2748	2323	2233	2929	2802	1701	2583	2299	2417	1542	2361	2120	3230	1904	2552	2249	1065	2409	1854	2140
	'l.lateraloccipital_1'	4167	4819	4603	3456	3244	4360	3827	3428	2807	4025	4557	4704	4192	4137	4963	4152	4223	4417	4288	3506	3152	2961	3948	4208	2493	4808	4143	2366	4204	4153	3970
	'l.lateraloccipital_2'	7156	8239	7885	7316	6669	7164	6816	5692	5642	7279	7362	8753	7768	8284	10341	8859	9359	8858	7239	7712	5023	6008	6062	7062	5982	8905	7211	4953	9035	6824	8193
	'l.lateralorbitofrontal_1'	3009	4305	4725	4610	3842	3651	4198	2666	3609	3962	3928	4032	3944	4455	5643	4673	4610	4424	4476	4481	2605	3987	3633	4578	3054	3941	4443	2403	3881	4535	4441
	'l.lateralorbitofrontal_2'	2941	3559	3617	4086	3103	2377	3121	2929	2751	3913	4154	3583	3504	4218	4420	3849	3582	3214	3602	3649	2133	3525	3230	4286	2728	3820	3929	2762	3274	3721	3657
	'l.lingual_1'	3348	4960	4146	4092	3668	3278	3714	3017	3528	3855	3889	3784	4009	4209	3812	2500	2605	3889	2831	3133	1953	3349	3484	3243	3532	4578	3249	2378	4341	2643	3780
	'l.lingual_2'	2401	3204	3857	3043	2651	2458	2665	2754	2951	3017	2391	3529	2337	2821	3349	2257	1270	3739	2285	2900	1067	2599	2406	2789	2021	3463	2726	1553	3140	2198	2669
	'l.medialorbitofrontal_1'	4079	4697	4307	4032	5027	4537	4224	3324	4132	4224	4799	5300	4950	4918	5866	5196	3850	4476	4627	4609	4855	5045	4508	4959	4134	5155	5042	2970	4401	4473	5134
	'l.middletemporal_1'	3526	4256	4847	4929	3981	6446	5172	4060	3669	3422	4449	4688	3433	3991	5419	5167	4486	5362	4070	3725	4317	4222	3639	4914	4394	5220	4037	2824	3558	3266	3854
	'l.middletemporal_2'	5936	5622	5946	7125	7565	7009	7426	4758	5405	6100	6716	5864	7218	7347	11232	6930	7476	8904	5743	6883	6157	5767	5614	6883	5289	7058	5967	5301	7053	6152	6008
	'l.paracentral_1'	3403	3493	3638	3406	3630	4009	3349	2899	2883	3364	3186	3607	3567	4596	4907	3048	4835	3934	3450	2805	3017	3533	3375	4007	2833	3466	3029	3391	3710	3283	3236
	'l.parahippocampal_1'	1306	2351	2448	1960	1598	2125	1722	1740	1748	1824	2371	2106	1867	2685	3435	2155	1551	2234	2471	2589	1069	1777	1847	2363	1086	2172	2165	1459	2392	1766	2432
	'l.parsopercularis_1'	3647	5189	4569	4780	4263	5899	4821	3789	4761	4713	4883	5408	4315	5061	6369	3941	5056	5184	4560	5362	4234	5376	3428	5562	2891	4024	5142	3603	4735	4598	4744
	'l.parsorbitalis_1'	2091	2312	2349	2758	1940	2141	2688	2244	2741	2022	2559	2411	2377	3150	3222	2988	2951	2648	2065	2456	2340	2117	2040	2902	1761	2808	2774	1820	2413	2123	2610
	'l.parstriangularis_1'	3486	3876	4120	3972	3956	4422	3263	2723	3170	4218	3452	3827	3654	4276	5071	3436	4021	4497	3167	4995	3629	3306	3133	4030	3010	3829	4412	2452	3662	4056	3081
	'l.pericalcarine_1'	1367	1962	3341	2042	2901	1875	2149	2136	2444	2210	1825	2595	2191	1966	1954	1773	1244	2193	1969	2521	1471	1487	2050	2167	1632	2600	2192	957	1936	2201	1692
	'l.postcentral_1'	2026	1753	2802	1961	1966	2110	2638	1516	1365	1716	1656	2059	1896	1957	3313	2129	2302	2392	1584	1705	1612	1977	1554	2092	1506	2101	1561	1410	2256	1654	1703
	'l.postcentral_2'	2720	3781	3753	3003	3099	3096	3119	2598	2284	3044	3283	3239	3362	3506	4061	2452	3648	3568	2423	2711	1996	2761	2429	2715	2485	3560	3035	2020	2990	2777	3096
	'l.postcentral_3'	3906	5578	4694	4802	5419	6534	5104	3997	4212	4752	4537	5351	4812	5028	8510	4812	5945	5650	5095	4957	4475	4277	3787	4326	4010	4989	4277	3337	4332	4853	5283
	'l.posteriorcingulate_1'	2314	3137	3339	3855	2648	3245	3609	2114	2314	3161	3448	3733	3581	3650	5853	3165	2837	4010	3434	2734	2486	3501	3275	3358	2729	3439	3138	2202	3163	2343	2960
	'l.precentral_1'	2643	2973	2695	2275	2467	2951	2873	1811	2242	2479	2838	2458	2395	2773	3517	2754	4104	2506	2515	2047	1937	2500	2516	3506	2075	2551	2404	2700	2333	2292	2651
	'l.precentral_2'	2321	3416	3835	2778	2557	3611	3581	2707	3129	2553	4074	3301	3286	3444	4272	3103	3404	3010	3173	2826	2524	3281	3110	4385	2885	3762	3911	2752	3034	3107	2449
	'l.precentral_3'	2320	3165	3597	2603	2077	3742	3094	2940	2721	2405	2987	3492	3642	2732	4994	2837	2764	2193	2714	2713	2607	2875	3182	2988	2397	2900	3628	2178	2582	2736	3411
	'l.precentral_4'	3361	5466	4804	4599	3788	5799	6115	3877	4471	3741	5082	5284	4509	4912	7565	4402	4547	4834	5188	3844	5660	3822	4975	4663	3117	4262	3967	3856	5263	4192	4767
	'l.precuneus_1'	3698	3659	2735	3483	3233	3674	3114	2360	3006	3437	2717	4479	3151	2950	4633	3263	4033	2976	3533	3307	2621	3911	2511	3661	4048	2950	2541	2268	3986	2966	3798
	'l.precuneus_2'	5304	6183	6254	6269	6106	6342	6201	4626	5060	4956	5043	6418	6620	6073	9076	6515	6288	6064	5865	6737	4934	5982	4908	6674	3842	5961	5153	3521	6122	5705	6091
	'l.rostralanteriorcingulate_1'	2115	2596	2960	3571	2561	3755	2817	2351	2190	2470	3759	3462	3016	2770	4388	2705	2403	3322	2591	2765	1821	2972	2842	2559	2039	3424	2726	1886	2883	2240	2661
	'l.rostralmiddlefrontal_1'	4720	5509	5769	6539	4531	6257	4374	4687	5464	6295	5407	6284	5867	6877	8249	4095	5916	6680	5587	4361	4532	5200	5558	6239	3203	5937	5762	3956	5263	5220	5335
	'l.rostralmiddlefrontal_2'	4229	5778	6563	6553	4699	6597	4655	5137	5129	6148	5672	6020	7107	8292	8084	4703	6267	6317	5118	5992	4953	4853	4599	6311	3925	7724	6117	3907	5903	5798	4559
	'l.rostralmiddlefrontal_3'	5115	5298	5092	5544	4625	5394	4454	4643	4203	5607	5760	6014	5901	7678	8015	4821	5087	5133	5451	5967	6374	4780	4245	5687	3631	6755	5168	4648	4725	5665	6369
	'l.superiorfrontal_1'	4677	4880	5427	5454	5554	6488	4619	4825	4182	5295	6153	4939	5580	6491	7880	4762	5127	5870	4768	5647	4980	4989	4457	5233	3773	5510	5233	4251	5362	5290	4621
	'l.superiorfrontal_2'	4436	5903	6236	6355	5168	7989	4584	4750	4669	4956	6450	5619	5746	6746	7828	5044	5600	5756	5099	5010	4437	5760	4899	5621	3663	4897	5516	4154	5558	4964	4701
	'l.superiorfrontal_3'	4034	4795	6174	4553	4296	7585	4851	4247	5369	5624	7285	6176	4552	6832	8242	6615	4872	6120	5253	4638	4400	5967	5434	7653	3915	5220	5983	3638	5703	5827	4940
	'l.superiorfrontal_4'	6991	7418	8840	6180	7180	10132	8610	5920	6663	8106	7529	7417	6386	8462	10907	8659	10349	9452	7542	5892	4787	7464	5495	9198	5172	8006	7810	6191	9132	7123	7364
	'l.superiorparietal_1'	3499	3942	2505	4151	4049	4513	4078	2633	3366	3729	2660	4388	3681	3539	5202	3526	3744	4639	2900	3856	3252	4669	2660	2851	4510	4256	3312	2540	3918	3130	3916
	'l.superiorparietal_2'	3889	5826	3474	4720	3597	4118	4019	2673	2995	4372	3166	4347	3949	3546	4328	4410	3991	3409	3439	4600	2862	5754	3005	3844	4580	5454	2808	2668	4498	4321	3967
	'l.superiorparietal_3'	5051	5394	4789	4728	4577	4811	5639	3517	3964	4464	4770	5494	6461	5522	6851	5039	5301	5601	4504	6290	5107	5302	3859	5361	3268	5239	3972	3117	4989	4412	5193
	'l.superiortemporal_1'	3166	3337	2826	2502	3235	4001	3173	2359	2658	3212	2867	3706	3157	3664	5484	2980	2445	3442	2909	3558	3123	3081	2593	3759	1962	2678	2962	2246	2476	2955	2053
	'l.superiortemporal_2'	7954	7756	9229	10670	9520	12749	10131	7669	6884	8930	9718	9052	10907	9424	11860	8948	8660	9545	8723	7901	9807	9628	8429	10016	6520	9930	9381	6420	8870	8108	9204
	'l.supramarginal_1'	3439	4269	3861	3384	4207	5350	3617	2338	3032	3576	2920	4841	4260	3765	5855	3641	4482	4670	3612	3432	3931	4304	2643	4383	3162	3895	4526	2645	3271	4838	3794
	'l.supramarginal_2'	6388	7525	7367	7115	7659	9087	6822	4878	6578	7170	6729	8157	7621	8677	9076	6243	6797	6931	8094	6312	7422	8237	5601	7752	6364	6227	6322	5890	6188	7078	5473
	'l.temporalpole_1'	2208	2569	3253	3273	3339	2436	3327	2232	2824	2316	3609	3328	2921	2656	3058	2357	2587	2566	2229	2856	2035	2073	3404	2483	1790	2989	2954	2062	2978	2232	2229
	'l.transversetemporal_1'	904	1046	1014	1215	1312	1655	1239	969	1156	1130	971	1478	969	1399	1448	1004	1038	1277	1526	1284	1421	1033	775	1372	809	1318	1009	685	900	1142	1241
	'r.bankssts_1'	2139	2695	3003	3407	2768	3326	3799	2473	2325	2986	1968	3361	2561	2637	3266	3232	3205	2393	2625	2533	3464	2571	2508	2512	2353	2627	3192	2317	2134	1917	2786
	'r.caudalanteriorcingulate_1'	1649	2025	2416	2525	2483	2555	2365	1861	1641	1620	3026	2775	2249	1432	2866	2604	3311	2846	2175	1382	1481	2248	2675	2580	1912	2914	1941	1910	1811	1391	1498
	'r.caudalmiddlefrontal_1'	5044	6225	8005	7082	5897	7176	7101	5408	6158	5976	7210	7279	5994	6037	9618	5630	7694	8068	6854	5746	6385	6065	6204	7910	5069	7428	6683	4024	6180	4935	7121
	'r.cuneus_1'	2651	3174	3758	2720	2870	2635	2646	2103	2414	2835	2613	3267	3523	3471	3453	2680	2475	2854	2943	3730	1806	2151	2702	3056	1757	3825	2492	1048	2815	3202	2254
	'r.entorhinal_1'	1068	1417	2082	1170	1418	2019	1593	1386	1311	1509	2561	1171	2494	2611	2573	1787	1915	1759	2611	1870	771	1834	1361	1895	1137	2058	2234	843	1747	1646	1576
	'r.frontalpole_1'	1012	949	789	836	546	857	897	908	732	997	1049	787	1060	1272	869	1123	874	673	1006	1236	677	1025	1061	685	1051	1172	1074	1060	758	1032	962
	'r.fusiform_1'	4034	4647	3822	6029	4823	4695	4801	4238	2921	3963	3706	5310	4949	4842	5314	5525	4270	5294	3778	4312	2992	4556	4166	5402	3753	4922	4806	3243	4094	3702	3695
	'r.fusiform_2'	4846	5800	4942	5764	6493	5671	4918	4702	4336	5309	6059	5842	6800	5359	7157	4809	4768	5449	5447	5357	4479	4593	5727	5695	3942	6242	4989	4112	5228	4926	5283
	'r.inferiorparietal_1'	5247	4599	5754	7413	6000	7226	5855	4316	4721	5677	5209	8013	4876	6997	8611	5909	6018	4120	6053	5723	4686	5744	4820	4925	5221	6927	4560	5615	6451	3838	6151
	'r.inferiorparietal_2'	4785	3051	3004	4789	4664	5480	5156	3291	3457	3617	4061	3763	5137	3930	5418	4747	4614	4817	4389	2733	4001	5317	3245	3510	3115	4925	3915	2758	4873	3227	3175
	'r.inferiorparietal_3'	5134	4295	3539	5396	6383	4795	5255	4556	4174	3993	4958	5510	6077	5831	7684	5622	5703	3999	4069	4236	3767	5464	4850	4484	4029	5087	4458	2512	5504	4939	4554
	'r.inferiortemporal_1'	4947	4627	5609	4717	5533	4131	4772	4009	3540	3500	6943	5927	5480	5842	6853	5229	5450	6053	7104	4782	3802	3803	5313	5694	3915	5198	5563	4264	3646	4463	5708
	'r.inferiortemporal_2'	6158	5706	5427	4735	6525	7334	5290	4032	3507	4950	6968	5600	5479	5290	7481	4458	4629	7249	4775	5264	3199	5132	4409	5544	3135	5680	4885	4302	3808	4156	5102
	'r.insula_1'	2847	2904	3080	3685	3336	3941	3451	2638	3250	2923	3892	3596	2779	3294	4199	2936	3120	3315	2859	2870	3203	2951	2758	3382	2648	2941	3382	2585	2834	3407	3123
	'r.insula_2'	2601	2962	4119	3574	3463	4060	2770	2877	3126	2999	3833	3327	3316	3861	5166	3367	3343	3650	3434	2962	2340	2893	3172	3682	2533	3081	3603	2289	3559	3367	2675
	'r.isthmuscingulate_1'	1840	2335	2838	2328	1843	1998	1954	1369	1715	1869	2200	2323	3015	2408	2728	2172	2068	2429	2184	1953	1448	2023	2188	2946	1613	2319	2243	1256	2095	1808	2477
	'r.lateraloccipital_1'	4392	4825	3681	3624	3727	3363	3304	3141	3163	3665	3718	4426	4070	4138	5629	4048	3031	4335	3322	3314	2995	3298	3332	3755	2093	4522	3228	1759	4326	3723	2760
	'r.lateraloccipital_2'	5144	5022	4485	4455	4629	4096	3616	4016	3788	4638	4361	5784	5398	4974	6332	5427	5047	5459	4813	4686	3958	4334	3952	5087	3324	5746	4509	3206	4649	4185	4259
	'r.lateraloccipital_3'	2276	2771	2777	2536	2953	2797	2735	2912	2479	2885	2879	3563	3440	3340	3388	3792	3117	3151	3198	2592	2993	2731	2699	3697	2229	3273	2650	2304	3429	2961	3079
	'r.lateralorbitofrontal_1'	3159	3643	5123	5145	4058	4316	4447	3017	3751	4051	4448	4131	3331	5054	5972	4805	4452	4005	4532	4365	2764	4009	3885	5063	3265	4207	4139	2899	4001	4634	4854
	'r.lateralorbitofrontal_2'	2895	2892	3275	3496	2502	3176	3055	2301	2583	3228	2810	3037	2951	3232	3583	3049	3579	2565	3009	3164	1998	3063	2893	3298	2118	3235	3257	2256	2403	3305	2838
	'r.lingual_1'	3264	4218	4200	4442	4314	4025	2986	3100	3944	3876	3704	3031	4011	4857	4117	3307	4260	4063	3024	3933	1449	2640	4423	3694	3071	4334	4511	2092	3812	3325	3120
	'r.lingual_2'	1477	2559	3081	2117	2063	2498	2550	1883	2735	2312	2378	2630	2100	2697	3161	1957	2697	3104	2164	2387	1017	2001	2101	2073	1557	3215	1580	1066	2357	1956	2275
	'r.medialorbitofrontal_1'	2432	3197	2568	2897	2691	2628	2521	2143	2514	2659	2943	2914	3162	3284	2954	2423	2886	2318	2789	2640	2907	2915	2746	2485	2419	3218	2841	2251	2677	2866	2738
	'r.medialorbitofrontal_2'	1983	2278	2113	2510	2455	2626	2134	1794	2155	1737	2299	2323	2783	2797	3342	2065	2363	2269	2498	2004	1795	2586	2486	2262	2004	2814	2702	1761	2025	2041	1896
	'r.middletemporal_1'	4911	4539	5181	5667	5490	7753	5520	4519	3792	4825	4859	5507	5096	6784	5911	6403	5305	7739	4779	5081	4994	4912	3632	5901	3923	5001	4900	3272	5844	4200	5214
	'r.middletemporal_2'	5650	5914	6848	7613	7470	7690	7234	4784	5625	6015	6442	8495	7214	7783	9757	8381	6794	8209	6864	6582	6605	6282	6270	8481	5578	6871	6599	5507	5534	6093	7115
	'r.paracentral_1'	3618	4946	3492	4376	4170	4637	4350	3413	3667	4260	3881	4418	3063	4219	5397	3493	4671	4412	4224	3631	3325	3932	3689	3708	2637	4571	3491	3515	4191	3391	3864
	'r.parahippocampal_1'	1414	1864	2408	2514	1191	2395	1925	1573	1576	1709	2625	2151	2178	2857	2806	2289	1870	2232	2129	1803	1039	1903	1509	1796	1093	2242	1907	1122	2204	1653	1881
	'r.parsopercularis_1'	2936	4633	3917	4627	3711	4685	4751	2988	4063	4073	3360	5065	4460	4579	5797	3671	4294	4148	4265	4647	3769	3543	2996	4281	3397	3401	3356	3061	3964	3726	3916
	'r.parsorbitalis_1'	2223	2661	3097	3253	2130	3283	3381	2119	2976	2225	2875	2699	2127	3506	4159	2995	3099	2601	2514	2815	2563	2158	2189	2742	2499	2678	2789	2241	2288	2452	2921
	'r.parstriangularis_1'	3568	3467	4026	5095	3724	3812	4205	3005	3682	4004	4315	4491	4678	5429	5813	5199	4657	4290	4280	4887	3983	3312	3683	5307	2649	3574	4239	3188	3729	4482	3205
	'r.pericalcarine_1'	1435	2003	3583	2170	1912	1459	1948	1449	2624	2327	2054	2314	3039	2290	2400	1831	1309	2214	2055	2992	1531	1519	2184	2442	1972	2076	2115	993	1953	2077	1387
	'r.postcentral_1'	3266	3543	3585	3675	3859	4137	3740	2386	3060	2858	2901	3946	3843	3734	6077	2550	3923	3907	3082	3574	3352	3598	2778	3399	2098	3233	3800	2019	3397	3300	3607
	'r.postcentral_2'	5219	7054	5933	6654	5681	6496	6665	4026	4614	6705	5611	6025	5842	6590	7666	4457	5712	6799	5116	5342	5150	5333	4847	6209	6008	5958	5609	3904	5342	4653	6268
	'r.posteriorcingulate_1'	2479	3471	3829	3277	2947	3524	3827	1985	2995	2712	3427	4276	3116	3516	4504	3266	3625	3781	3553	2473	2097	2882	2844	3207	2569	3681	3471	2166	3296	2313	2339
	'r.precentral_1'	2869	4581	4047	3578	3249	4398	4344	3138	3253	3068	3624	5173	4513	3782	7148	3394	3995	3818	3601	3767	3051	3422	3354	3839	3504	3604	5086	2364	4068	3395	4413
	'r.precentral_2'	3750	4756	5065	4046	3103	5128	5301	3633	4379	4090	5640	4783	5688	3769	5741	4618	4246	4402	4476	4152	3359	4816	4247	5752	2690	5257	4831	3225	4250	5085	4790
	'r.precentral_3'	5215	4234	5002	4384	4362	5810	5181	3730	4867	4982	6070	4886	4280	4961	6183	4844	5330	5159	5615	4069	4048	4606	4321	5652	3727	6781	6048	4029	5055	5722	4664
	'r.precuneus_1'	3928	4978	4533	4789	4852	4862	5008	3200	3769	4258	4132	5866	5538	4931	7527	4796	5358	5021	4898	4473	3176	4468	4299	5739	3306	4038	3663	2436	4477	5294	4751
	'r.precuneus_2'	5089	6144	4612	5637	5720	5598	5481	3961	4131	4699	3857	6568	4977	5391	7557	5529	5452	6012	5701	4700	5057	6251	3713	5746	4254	4535	4442	2910	6017	4879	5580
	'r.rostralanteriorcingulate_1'	1729	2176	2414	2039	2258	2807	1816	1817	1877	1408	2682	2387	1816	1304	2415	1967	2349	1975	1617	1768	1126	1729	1677	2303	1243	2090	1326	1890	1824	1619	1961
	'r.rostralmiddlefrontal_1'	6829	7626	9474	8933	8328	13566	8266	8861	7219	9747	10244	11234	10212	12700	12286	11452	11020	9754	8212	8061	9295	9760	10370	11486	7058	9495	8725	6140	8915	7644	9440
	'r.rostralmiddlefrontal_2'	6132	6214	7416	7751	5810	8650	6534	6804	5375	7709	7174	7096	8208	7962	8889	6390	6635	6827	6810	7957	7685	7338	6737	8061	7039	7038	8343	6522	6125	5681	7356
	'r.superiorfrontal_1'	6055	6383	6609	6742	6829	8723	6302	5902	5624	6308	6884	6234	7967	7105	9145	7405	6580	6491	6281	6682	6283	6372	5676	5948	5869	7085	7104	4228	6683	7055	5869
	'r.superiorfrontal_2'	5674	6367	7746	6660	6144	8643	5740	5862	5650	8526	6558	6677	6057	8718	10037	7401	6739	7919	6319	6314	5600	7606	5654	8582	6500	7269	7827	4767	6588	6878	6377
	'r.superiorfrontal_3'	4872	5686	6715	5899	4984	6697	5019	4317	5225	6848	7239	5400	4128	6617	8405	5014	6387	6971	5249	4593	4048	5588	3983	6385	4552	5435	5145	4905	6034	5475	5569
	'r.superiorfrontal_4'	3967	3298	4826	3852	3327	3701	3160	2231	3189	4925	4371	3665	2322	3689	5561	3210	5325	5562	3562	3126	2680	2754	2974	3415	3779	3575	4137	2671	3983	4218	3811
	'r.superiorparietal_1'	3941	4858	4231	3875	5033	4271	3736	2558	3912	4215	3378	4622	3686	3823	5404	4510	4192	4547	4070	4314	2913	5284	2641	3271	3132	4181	3551	2959	4530	3181	4008
	'r.superiorparietal_2'	4476	3474	3864	3896	4148	4470	3565	2614	2760	3668	2820	3815	3461	3417	5603	4444	4543	3161	4068	4054	3222	4571	2633	3833	2814	4215	2979	2452	4992	2968	3549
	'r.superiorparietal_3'	5543	5332	3903	5034	4305	4458	5701	3612	2996	4542	3960	5279	4990	4891	6564	4923	5644	5387	4831	4593	3294	4646	4671	5747	2631	5815	3440	2995	4355	4756	3545
	'r.superiortemporal_1'	5155	6337	6121	6963	5958	7518	7165	4764	5408	6987	5039	7158	5914	6428	9268	7025	7303	6663	5639	6577	7051	6174	5353	6688	4596	5324	6100	4411	5218	5030	6389
	'r.superiortemporal_2'	3901	5153	5890	5821	6910	6595	5320	4832	4639	5324	6715	6614	5038	6219	7351	6060	6633	5671	5117	4811	4998	4902	5855	6385	3853	5585	5316	4281	4734	4404	4624
	'r.supramarginal_1'	3693	4442	4713	4505	4740	5920	4935	2938	4308	4843	5111	6108	5392	3666	7495	4427	6412	4800	5144	4215	3849	5713	3257	5252	3210	4496	3943	3784	4625	3573	4488
	'r.supramarginal_2'	4819	5782	6424	5209	6645	7298	5706	3721	5201	5034	5201	5698	5840	5138	7641	5214	5962	7425	5161	5825	5551	5748	4342	5715	3682	5267	5313	4066	5109	5225	6100
	'r.temporalpole_1'	1532	1843	2808	2764	2984	3082	2593	2006	2151	2119	3126	2953	2837	2837	3098	1808	2785	2333	2168	2651	1474	1506	3096	2943	2070	2716	2913	2110	2183	2376	2529
	'r.transversetemporal_1'	749	1182	757	1010	971	916	1039	707	847	979	920	982	889	1061	1374	905	756	1053	955	1156	899	813	744	939	651	777	1009	607	772	643	1011
	Region overlaps with resection (1=true)
	'l.bankssts_1'	0	0	0	0	0	0	0	0	0	1	0	1	0	0	0	1	0	0	0	0	0	0	0	0	0	0	0	0	0	0	0
	'l.caudalanteriorcingulate_1'	0	0	0	0	0	0	0	0	0	0	0	0	0	0	0	0	0	0	0	0	0	1	0	0	0	0	0	0	0	0	0
	'l.caudalmiddlefrontal_1'	0	0	0	0	0	0	1	1	0	0	0	0	0	0	0	0	0	0	0	0	0	1	1	1	0	0	1	0	0	0	0
	'l.cuneus_1'	0	0	0	0	0	0	0	0	0	0	0	0	0	0	0	0	1	0	0	0	0	0	0	0	0	0	0	0	0	0	0
	'l.entorhinal_1'	1	0	0	0	1	0	0	0	1	0	0	0	0	0	0	1	0	0	1	0	0	0	0	0	0	0	0	0	0	0	0
	'l.frontalpole_1'	0	0	0	0	0	1	0	0	0	0	0	0	0	0	0	0	0	0	0	0	0	1	0	0	0	0	0	0	0	0	0
	'l.fusiform_1'	0	0	0	0	0	0	0	0	0	0	0	0	0	0	0	1	1	0	0	0	0	0	0	0	0	0	0	0	0	0	0
	'l.fusiform_2'	1	0	0	0	1	0	0	0	1	0	0	0	0	0	0	1	0	0	1	0	0	0	0	0	0	0	0	0	0	0	0
	'l.inferiorparietal_1'	0	0	0	0	0	0	0	0	0	0	0	0	0	0	0	0	1	0	0	0	0	0	0	0	0	0	0	0	0	0	0
	'l.inferiorparietal_2'	0	0	0	0	0	0	0	0	0	0	0	0	0	0	0	0	1	0	0	0	0	0	0	0	0	0	0	0	0	0	0
	'l.inferiortemporal_1'	1	0	0	0	1	0	0	0	1	1	0	1	0	0	0	1	0	0	1	0	0	0	0	0	0	0	0	0	0	0	0
	'l.inferiortemporal_2'	0	0	0	0	1	0	0	0	1	1	0	1	0	0	0	1	0	0	0	0	0	0	0	0	0	0	0	0	0	0	0
	'l.insula_1'	1	0	0	0	1	0	0	0	0	0	0	1	0	0	0	1	0	0	1	0	0	0	0	0	0	0	0	0	0	0	0
	'l.insula_2'	0	0	0	0	0	0	0	0	0	0	0	0	0	0	0	1	0	0	0	0	0	0	0	0	0	0	0	0	0	0	0
	'l.isthmuscingulate_1'	0	0	0	0	0	0	0	0	0	0	0	0	0	0	0	0	1	0	0	0	0	0	0	0	0	0	0	0	0	0	0
	'l.lateraloccipital_1'	0	0	0	0	0	0	0	0	0	0	0	0	0	0	0	0	1	0	0	0	0	0	0	0	0	0	0	0	0	0	0
	'l.lateraloccipital_2'	0	0	0	0	0	0	0	0	0	0	0	0	0	0	0	0	1	0	0	0	0	0	0	0	0	0	0	0	0	0	0
	'l.lateralorbitofrontal_1'	0	0	0	0	0	1	0	0	1	0	0	0	0	0	0	1	0	0	1	0	0	1	0	0	0	0	0	0	0	0	0
	'l.lateralorbitofrontal_2'	0	0	0	0	0	1	0	0	0	0	0	0	0	0	0	0	0	0	0	0	0	1	0	0	0	0	0	0	0	0	0
	'l.lingual_1'	0	0	0	0	0	0	0	0	0	0	0	0	0	0	0	0	1	0	0	0	0	0	0	0	0	0	0	0	0	0	0
	'l.lingual_2'	0	0	0	0	0	0	0	0	0	0	0	0	0	0	0	0	1	0	0	0	0	1	0	0	0	0	0	0	0	0	0
	'l.medialorbitofrontal_1'	0	0	0	0	0	1	0	0	0	0	0	0	1	0	0	0	0	0	0	0	0	1	0	0	0	0	0	0	0	0	0
	'l.middletemporal_1'	0	0	0	0	0	0	0	0	0	1	0	1	0	0	0	1	0	0	0	0	0	0	0	0	0	0	0	0	0	0	0
	'l.middletemporal_2'	1	0	0	0	1	0	0	0	1	1	0	1	0	0	0	1	0	0	1	0	0	0	0	0	0	0	0	0	0	0	0
	'l.paracentral_1'	0	0	0	0	0	0	0	0	0	0	0	0	0	0	0	0	0	0	0	0	0	0	0	0	0	0	0	0	0	0	0
	'l.parahippocampal_1'	1	0	0	0	1	0	0	0	1	0	0	0	0	0	0	1	1	0	1	0	0	0	0	0	0	0	0	0	0	0	0
	'l.parsopercularis_1'	0	0	0	0	0	1	1	0	0	1	0	1	0	0	0	0	0	0	0	0	0	1	1	0	0	0	1	0	0	0	0
	'l.parsorbitalis_1'	0	0	0	0	0	1	0	0	0	0	0	0	0	0	0	0	0	0	0	0	0	1	0	0	0	0	0	0	0	0	0
	'l.parstriangularis_1'	0	0	0	0	0	1	0	0	0	0	0	0	0	0	0	0	0	0	0	0	0	1	0	0	0	0	0	0	0	0	0
	'l.pericalcarine_1'	0	0	0	0	0	0	0	0	0	0	0	0	0	0	0	0	1	0	0	0	0	0	0	0	0	0	0	0	0	0	0
	'l.postcentral_1'	0	0	0	0	0	0	0	0	0	0	0	0	0	0	0	0	0	0	0	0	0	0	0	0	0	0	0	0	0	0	0
	'l.postcentral_2'	0	0	0	0	0	0	0	0	0	0	0	0	0	0	0	0	0	0	0	0	0	0	0	0	0	0	0	0	0	0	0
	'l.postcentral_3'	0	0	0	0	0	0	0	0	0	0	0	1	0	0	0	0	0	0	0	0	0	0	0	0	0	0	0	0	0	0	0
	'l.posteriorcingulate_1'	0	0	0	0	0	0	0	0	0	0	0	0	0	0	0	0	0	0	0	0	0	0	0	0	0	0	0	0	0	0	0
	'l.precentral_1'	0	0	0	0	0	0	0	1	0	0	0	0	0	0	0	0	0	0	0	0	0	0	1	0	0	0	0	0	0	0	0
	'l.precentral_2'	0	0	0	0	0	0	0	1	0	0	0	0	0	0	0	0	0	0	0	0	0	0	0	0	0	0	0	0	0	0	0
	'l.precentral_3'	0	0	0	0	0	0	0	0	0	0	0	0	0	0	0	0	0	0	0	0	0	0	1	0	0	0	1	0	0	0	0
	'l.precentral_4'	0	0	0	0	0	0	1	0	0	1	0	1	0	0	0	0	0	0	0	0	0	0	1	0	0	0	1	0	0	0	0
	'l.precuneus_1'	0	0	0	0	0	0	0	0	0	0	0	0	0	0	0	0	1	0	0	0	0	0	0	0	0	0	0	0	0	0	0
	'l.precuneus_2'	0	0	0	0	0	0	0	0	0	0	0	0	0	0	0	0	1	0	0	0	0	0	0	0	0	0	0	0	0	0	0
	'l.rostralanteriorcingulate_1'	0	0	0	0	0	1	0	0	0	0	0	0	0	1	0	0	0	0	0	0	0	1	0	0	0	0	0	0	0	0	0
	'l.rostralmiddlefrontal_1'	0	0	0	0	0	1	1	0	0	0	0	0	0	0	0	0	0	0	0	0	0	1	1	1	0	0	1	0	0	0	0
	'l.rostralmiddlefrontal_2'	0	0	0	0	0	1	0	0	0	0	0	0	0	0	0	0	0	0	0	0	0	1	0	1	0	0	0	0	0	0	0
	'l.rostralmiddlefrontal_3'	0	0	0	0	0	1	0	0	0	0	0	0	0	0	0	0	0	0	0	0	0	1	0	1	0	0	0	0	0	0	0
	'l.superiorfrontal_1'	0	0	0	0	0	1	0	0	0	0	0	0	1	1	0	0	0	0	0	0	0	1	0	1	0	0	0	0	0	0	0
	'l.superiorfrontal_2'	0	0	0	0	0	1	1	0	0	0	0	0	0	1	0	0	0	0	0	0	0	1	1	1	0	0	0	0	0	0	0
	'l.superiorfrontal_3'	0	0	0	0	0	0	1	1	0	0	0	0	0	0	0	0	0	0	0	0	0	1	1	1	0	0	0	0	0	0	0
	'l.superiorfrontal_4'	0	0	0	0	0	0	1	1	0	0	0	0	0	1	0	0	0	0	0	0	0	1	0	1	0	0	0	0	0	0	0
	'l.superiorparietal_1'	0	0	0	0	0	0	0	0	0	0	0	0	0	0	0	0	1	0	0	0	0	0	0	0	0	0	0	0	0	0	0
	'l.superiorparietal_2'	0	0	0	0	0	0	0	0	0	0	0	0	0	0	0	0	1	0	0	0	0	0	0	0	0	0	0	0	0	0	0
	'l.superiorparietal_3'	0	0	0	0	0	0	0	0	0	0	0	0	0	0	0	0	1	0	0	0	0	0	0	0	0	0	0	0	0	0	0
	'l.superiortemporal_1'	0	0	0	0	0	0	0	0	0	1	0	1	0	0	0	0	0	0	0	0	0	0	0	0	0	0	0	0	0	0	0
	'l.superiortemporal_2'	1	0	0	0	1	0	0	0	1	1	0	1	0	0	0	1	0	0	1	0	0	1	0	0	0	0	0	0	0	0	0
	'l.supramarginal_1'	0	0	0	0	0	0	0	0	0	0	0	1	0	0	0	0	0	0	0	0	0	0	0	0	0	0	0	0	0	0	0
	'l.supramarginal_2'	0	0	0	0	0	0	0	0	0	0	0	0	0	0	0	0	0	0	0	0	0	0	0	0	0	0	0	0	0	0	0
	'l.temporalpole_1'	1	0	0	0	1	0	0	0	1	0	0	0	0	0	0	1	0	0	1	0	0	0	0	0	0	0	0	0	0	0	0
	'l.transversetemporal_1'	0	0	0	0	0	0	0	0	0	0	0	1	0	0	0	0	0	0	0	0	0	0	0	0	0	0	0	0	0	0	0
	'r.bankssts_1'	0	0	0	0	0	0	0	0	0	0	0	0	0	0	0	0	0	0	0	0	1	0	0	0	0	0	0	0	0	0	0
	'r.caudalanteriorcingulate_1'	0	0	0	0	0	0	0	0	0	0	0	0	0	1	0	0	0	0	0	0	0	0	0	1	0	1	0	0	0	0	0
	'r.caudalmiddlefrontal_1'	0	0	0	0	0	0	0	0	0	0	0	0	0	1	0	0	0	0	0	0	0	0	0	0	0	1	0	0	0	0	0
	'r.cuneus_1'	0	1	0	1	0	0	0	0	0	0	0	0	0	0	0	0	1	0	0	0	0	0	0	0	0	0	0	0	0	0	0
	'r.entorhinal_1'	0	0	1	0	0	0	0	0	0	0	1	0	0	0	1	0	0	1	0	1	0	0	0	0	1	0	0	1	1	1	1
	'r.frontalpole_1'	0	0	0	0	0	0	0	0	0	0	0	0	1	1	0	0	0	0	0	0	0	0	0	0	0	0	0	0	0	0	0
	'r.fusiform_1'	0	0	1	0	0	0	0	0	0	0	0	0	0	0	0	0	0	0	0	0	0	0	0	0	0	0	0	0	0	0	0
	'r.fusiform_2'	0	0	1	0	0	0	0	0	0	0	1	0	0	0	1	0	0	1	0	1	0	0	0	0	1	0	0	1	1	1	1
	'r.inferiorparietal_1'	0	1	0	1	0	0	0	0	0	0	0	0	0	0	0	0	0	0	0	0	1	0	0	0	0	0	0	0	0	0	0
	'r.inferiorparietal_2'	0	0	0	1	0	0	0	0	0	0	0	0	0	0	0	0	0	0	0	0	1	0	0	0	0	0	0	0	0	0	0
	'r.inferiorparietal_3'	0	0	0	1	0	0	0	0	0	0	0	0	0	0	0	0	0	0	0	0	1	0	0	0	0	0	0	0	0	0	0
	'r.inferiortemporal_1'	0	0	1	0	0	0	0	0	0	0	1	0	0	0	1	0	0	1	0	1	0	0	0	0	1	0	0	1	1	1	1
	'r.inferiortemporal_2'	0	0	1	0	0	0	0	0	0	0	0	0	0	0	0	0	0	1	0	1	0	0	0	0	1	0	0	0	1	1	0
	'r.insula_1'	0	0	1	0	0	0	0	0	0	0	0	0	0	0	0	0	0	0	0	0	0	0	0	0	0	0	0	0	0	0	0
	'r.insula_2'	0	0	1	0	0	0	0	0	0	0	1	0	0	0	1	0	0	1	0	1	0	0	0	0	1	0	0	1	1	1	1
	'r.isthmuscingulate_1'	0	0	0	0	0	0	0	0	0	0	0	0	0	0	0	0	0	0	0	0	0	0	0	0	0	0	0	0	0	0	0
	'r.lateraloccipital_1'	0	0	0	1	0	0	0	0	0	0	0	0	0	0	0	0	0	0	0	0	0	0	0	0	0	0	0	0	0	0	0
	'r.lateraloccipital_2'	0	0	0	1	0	0	0	0	0	0	0	0	0	0	0	0	0	0	0	0	0	0	0	0	0	0	0	0	0	0	0
	'r.lateraloccipital_3'	0	0	0	1	0	0	0	0	0	0	0	0	0	0	0	0	0	0	0	0	0	0	0	0	0	0	0	0	0	0	0
	'r.lateralorbitofrontal_1'	0	0	0	0	0	0	0	0	0	0	0	0	1	0	1	0	0	0	0	1	0	0	0	0	0	0	0	1	0	0	1
	'r.lateralorbitofrontal_2'	0	0	0	0	0	0	0	0	0	0	0	0	1	0	0	0	0	0	0	0	0	0	0	0	0	0	0	0	0	0	0
	'r.lingual_1'	0	0	0	1	0	0	0	0	0	0	0	0	0	0	0	0	1	0	0	0	0	0	0	0	0	0	0	0	0	0	0
	'r.lingual_2'	0	0	1	0	0	0	0	0	0	0	0	0	0	0	0	0	0	0	0	0	0	0	0	0	0	0	0	0	0	0	0
	'r.medialorbitofrontal_1'	0	0	0	0	0	1	0	0	0	0	0	0	1	1	0	0	0	0	0	0	0	1	0	0	0	0	0	0	0	0	0
	'r.medialorbitofrontal_2'	0	0	0	0	0	1	0	0	0	0	0	0	1	1	0	0	0	0	0	0	0	1	0	0	0	0	0	0	0	0	0
	'r.middletemporal_1'	0	0	1	1	0	0	0	0	0	0	0	0	0	0	0	0	0	1	0	0	1	0	0	0	0	0	0	1	0	1	0
	'r.middletemporal_2'	0	0	1	0	0	0	0	0	0	0	1	0	0	0	1	0	0	1	0	1	0	0	0	0	1	0	0	1	1	1	1
	'r.paracentral_1'	0	1	0	0	0	0	0	0	0	0	0	0	0	0	0	0	0	0	0	0	0	0	0	0	0	1	0	0	0	0	0
	'r.parahippocampal_1'	0	0	1	0	0	0	0	0	0	0	1	0	1	0	1	0	0	1	0	1	0	0	0	0	1	0	0	1	1	1	1
	'r.parsopercularis_1'	0	0	1	0	0	0	0	0	0	0	0	0	0	0	0	0	0	0	0	0	0	0	0	0	0	0	0	1	0	0	1
	'r.parsorbitalis_1'	0	0	0	0	0	0	0	0	0	0	0	0	1	0	1	0	0	0	0	0	0	0	0	0	0	0	0	0	0	0	1
	'r.parstriangularis_1'	0	0	0	0	0	0	0	0	0	0	0	0	1	0	0	0	0	0	0	0	0	0	0	0	0	0	0	0	0	0	0
	'r.pericalcarine_1'	0	0	0	1	0	0	0	0	0	0	0	0	0	0	0	0	1	0	0	0	0	0	0	0	0	0	0	0	0	0	0
	'r.postcentral_1'	0	0	0	0	0	0	0	0	0	0	0	0	0	0	0	0	0	0	0	0	1	0	0	0	0	0	0	0	0	0	0
	'r.postcentral_2'	0	1	0	0	0	0	0	0	0	0	0	0	0	0	0	0	0	0	0	0	1	0	0	0	0	0	0	0	0	0	0
	'r.posteriorcingulate_1'	0	0	0	0	0	0	0	0	0	0	0	0	0	0	0	0	0	0	0	0	0	0	0	0	0	1	0	0	0	0	0
	'r.precentral_1'	0	0	0	0	0	0	0	0	0	0	0	0	0	0	1	0	0	0	0	1	1	0	0	0	0	0	0	0	0	0	0
	'r.precentral_2'	0	0	0	0	0	0	0	0	0	0	0	0	0	0	0	0	0	0	0	0	1	0	0	0	0	1	0	0	0	0	0
	'r.precentral_3'	0	0	0	0	0	0	0	0	0	0	0	0	0	0	0	0	0	0	0	0	1	0	0	0	0	1	0	0	0	0	0
	'r.precuneus_1'	0	1	0	0	0	0	0	0	0	0	0	0	0	0	0	0	1	0	0	0	0	0	0	0	0	0	0	0	0	0	0
	'r.precuneus_2'	0	1	0	0	0	0	0	0	0	0	0	0	0	0	0	0	1	0	0	0	0	0	0	0	0	0	0	0	0	0	0
	'r.rostralanteriorcingulate_1'	0	0	0	0	0	1	0	0	0	0	0	0	1	1	0	0	0	0	0	0	0	1	0	0	0	0	0	0	0	0	0
	'r.rostralmiddlefrontal_1'	0	0	0	0	0	0	0	0	0	0	0	0	1	1	0	0	0	0	0	0	0	0	0	0	0	0	0	0	0	0	0
	'r.rostralmiddlefrontal_2'	0	0	0	0	0	0	0	0	0	0	0	0	1	1	0	0	0	0	0	0	0	0	0	0	0	0	0	0	0	0	0
	'r.superiorfrontal_1'	0	0	0	0	0	1	0	0	0	0	0	0	1	1	0	0	0	0	0	0	0	0	0	1	0	0	0	0	0	0	0
	'r.superiorfrontal_2'	0	0	0	0	0	0	0	0	0	0	0	0	1	1	0	0	0	0	0	0	0	0	0	1	0	1	0	0	0	0	0
	'r.superiorfrontal_3'	0	0	0	0	0	0	0	0	0	0	0	0	0	1	0	0	0	0	0	0	0	0	0	0	0	1	0	0	0	0	0
	'r.superiorfrontal_4'	0	0	0	0	0	0	0	0	0	0	0	0	0	1	0	0	0	0	0	0	0	0	0	0	0	1	0	0	0	0	0
	'r.superiorparietal_1'	0	1	0	0	0	0	0	0	0	0	0	0	0	0	0	0	0	0	0	0	1	0	0	0	0	0	0	0	0	0	0
	'r.superiorparietal_2'	0	1	0	1	0	0	0	0	0	0	0	0	0	0	0	0	0	0	0	0	0	0	0	0	0	0	0	0	0	0	0
	'r.superiorparietal_3'	0	1	0	1	0	0	0	0	0	0	0	0	0	0	0	0	1	0	0	0	0	0	0	0	0	0	0	0	0	0	0
	'r.superiortemporal_1'	0	0	1	0	0	0	0	0	0	0	0	0	0	0	0	0	0	1	0	1	1	0	0	0	0	0	0	1	1	1	0
	'r.superiortemporal_2'	0	0	1	0	0	0	0	0	0	0	1	0	0	0	1	0	0	1	0	1	0	0	0	0	1	0	0	1	1	1	1
	'r.supramarginal_1'	0	0	0	1	0	0	0	0	0	0	0	0	0	0	0	0	0	0	0	0	1	0	0	0	0	0	0	0	0	0	0
	'r.supramarginal_2'	0	0	0	1	0	0	0	0	0	0	0	0	0	0	0	0	0	0	0	0	1	0	0	0	0	0	0	0	0	0	0
	'r.temporalpole_1'	0	0	1	0	0	0	0	0	0	0	1	0	0	0	1	0	0	1	0	1	0	0	0	0	1	0	0	1	1	1	1
	'r.transversetemporal_1'	0	0	0	0	0	0	0	0	0	0	0	0	0	0	0	0	0	0	0	0	1	0	0	0	0	0	0	0	0	0	0
