# Supplementary material for: Removal of Interictal MEG-Derived Network Hubs Is Associated With Postoperative Seizure Freedom
Source: PubMed Central journal article supplement (PMC7543719; doi:10.3389/fneur.2020.563847), 2020-09-24
Supplement: Table_1.pdf [file Table_1.pdf]

## **Supplementary material: Removal of interictal MEG-derived network hubs is associated with postoperative seizure freedom**

Sriharsha Ramaraju<sup>1</sup>, Yujiang Wang<sup>1,2,3</sup>, Nishant Sinha<sup>1,3</sup>, Andrew W McEvoy<sup>2</sup>, Anna Miserocchi<sup>2</sup>, Jane de Tisi<sup>2</sup>, John S Duncan<sup>2</sup>, Fergus Rugg-Gunn<sup>2</sup>, Peter N Taylor<sup>1,2,3\*</sup>

1. CNNP Lab ([www.cnnp-lab.com](http://www.cnnp-lab.com)), Interdisciplinary Computing and Complex BioSystems Group, School of Computing, Newcastle Helix, Newcastle University, UK
2. Department of Clinical and Experimental Epilepsy, UCL Queen Square Institute of Neurology, Queen Square, London WC1N 3BG, UK
3. Faculty of Medical Science, Newcastle University, UK

# Supplementary Material

**Table S1: Patient information.** For binary variables 1 = true. Abbreviations: FCD; focal cortical dysplasia, HS; hippocampal sclerosis, EFS; end-folium sclerosis. N/A; data not available.

| Patient ID | D <sub>RS</sub> segment 1 | D <sub>RS</sub> segment 2 | D <sub>RS</sub> segment 3 | Epilepsy duration | Outcome good | Type   | Side | Pathology | Is female | Surgery age |
|------------|---------------------------|---------------------------|---------------------------|-------------------|--------------|--------|------|-----------|-----------|-------------|
| '998'      | 0.216                     | 0.288                     | 0.228                     | 17                | 0            | T Lx   | L    | OTHER     | 0         | 31          |
| '965'      | 0.660                     | 0.582                     | 0.523                     | 20.2              | 0            | P Lesx | R    | FCD       | 0         | 32          |
| '940'      | 0.277                     | 0.409                     | 0.410                     | 5.7               | 0            | T Lx   | R    | OTHER     | 0         | 25          |
| '934'      | 0.510                     | 0.410                     | 0.529                     | 10                | 1            | O P Lx | R    | OTHER     | 1         | 29          |
| '931'      | 0.196                     | 0.274                     | 0.149                     | 10                | 0            | T Lx   | L    | HS (EFS)  | 0         | 30          |
| '910'      | 0.673                     | 0.683                     | 0.593                     | 12.3              | 0            | F Lx   | L    | FCD       | 0         | 23          |
| '874'      | 0.741                     | 0.761                     | 0.747                     | 31                | 0            | F Lx   | L    | FCD       | 1         | 38          |
| '851'      | 0.440                     | 0.760                     | 0.701                     | 24                | 0            | F Lx   | L    | OTHER     | 1         | 43          |
| '815'      | 0.333                     | 0.150                     | 0.365                     | 9                 | 0            | T Lx   | L    | OTHER     | 1         | 24          |
| '805'      | 0.234                     | 0.206                     | 0.478                     | 8                 | 0            | T Lx   | L    | OTHER     | 1         | 32          |
| '803'      | 0.355                     | 0.311                     | 0.382                     | 18.5              | 0            | T Lx   | R    | NAD       | 0         | 34          |
| '782'      | 0.218                     | 0.178                     | 0.414                     | 22                | 1            | T Lx   | L    | OTHER     | 0         | 29          |
| '1302'     | 0.583                     | 0.497                     | 0.432                     | 41.1              | 1            | T Lx   | R    | OTHER     | 0         | 47          |
| '1284'     | 0.761                     | 0.574                     | 0.592                     | 16.4              | 0            | F Lx   | R    | FCD       | 0         | 21          |
| '1236'     | 0.216                     | N/A                       | N/A                       | 9.6               | 1            | T Lx   | R    | HS        | 0         | 21          |
| '1220'     | 0.494                     | 0.463                     | 0.341                     | 11.6              | 0            | T Lx   | L    | OTHER     | 0         | 27          |
| '1216'     | 0.575                     | 0.628                     | 0.666                     | 21.3              | 0            | O P Lx | L    | FCD       | 0         | 22          |
| '1211'     | 0.267                     | 0.317                     | 0.483                     | 13.2              | 0            | T Lx   | R    | OTHER     | 0         | 26          |
| '1210'     | 0.546                     | 0.484                     | 0.451                     | 52.89             | 1            | T Lx   | L    | HS        | 0         | 53          |
| '1200'     | 0.264                     | 0.471                     | 0.244                     | 24.34             | 1            | T Lx   | R    | HS        | 1         | 25          |
| '1182'     | 0.315                     | 0.478                     | 0.581                     | 21.4              | 0            | P Lesx | R    | FCD       | 0         | 28          |
| '1178'     | 0.742                     | N/A                       | N/A                       | 15.3              | 0            | F Lx   | L    | OTHER     | 1         | 23          |
| '1168'     | 0.590                     | N/A                       | N/A                       | 35.3              | 0            | F Lx   | L    | FCD       | 1         | 60          |
| '1163'     | 0.522                     | 0.526                     | 0.570                     | 24.6              | 1            | F Lx   | L    | FCD       | 1         | 28          |
| '1142'     | 0.160                     | 0.292                     | 0.269                     | 5.1               | 1            | T Lx   | R    | OTHER     | 1         | 27          |
| '1106'     | 0.579                     | 0.630                     | 0.713                     | 21.5              | 0            | F Lx   | R    | FCD       | 0         | 27          |
| '1085'     | 0.156                     | 0.193                     | 0.253                     | 13.9              | 1            | F Lx   | L    | FCD       | 0         | 28          |
| '1068'     | 0.125                     | 0.102                     | 0.340                     | 26                | 1            | T Lx   | R    | HS        | 1         | 48          |
| '1063'     | 0.218                     | 0.247                     | 0.103                     | 17                | 1            | T Lx   | R    | OTHER     | 0         | 35          |
| '1055'     | 0.282                     | 0.304                     | 0.289                     | 33.7              | 0            | T Lx   | R    | OTHER     | 0         | 48          |
| '1022'     | 0.073                     | 0.167                     | 0.111                     | 31.9              | 1            | T Lx   | R    | OTHER     | 1         | 42          |

**Table S2:** Confusion matrices for DRS measure at threshold optimal for maximum sensitivity and specificity.

|                |         | Expected outcome |       |
|----------------|---------|------------------|-------|
|                |         | Segment 1        | ILAE1 |
| Actual outcome | ILAE1   | 16               | 3     |
|                | ILAE2-5 | 4                | 8     |

|                |         | Expected outcome |       |
|----------------|---------|------------------|-------|
|                |         | Segment 2        | ILAE1 |
| Actual outcome | ILAE1   | 15               | 2     |
|                | ILAE2-5 | 6                | 5     |

|                |         | Expected outcome |       |
|----------------|---------|------------------|-------|
|                |         | Segment 3        | ILAE1 |
| Actual outcome | ILAE1   | 14               | 3     |
|                | ILAE2-5 | 5                | 6     |

**Table S3:** AUC and P values for all parcellations and segments.

|           | Num patients | 68 ROIs |       | 114 ROIs |       | 219 ROIs |       | 448 ROIs |       |
|-----------|--------------|---------|-------|----------|-------|----------|-------|----------|-------|
|           |              | AUC     | P val | AUC      | P val | AUC      | P val | AUC      | P val |
| Segment 1 | 31           | 0.61    | 0.16  | 0.76     | 0.01  | 0.75     | 0.01  | 0.73     | 0.02  |
| Segment 2 | 28           | 0.6     | 0.19  | 0.7      | 0.04  | 0.65     | 0.09  | 0.61     | 0.17  |
| Segment 3 | 28           | 0.68    | 0.05  | 0.74     | 0.02  | 0.68     | 0.06  | 0.61     | 0.16  |

**Table S4:** Association between mean functional connectivity and duration of epilepsy

|           | Num patients | R <sup>2</sup> | P value |
|-----------|--------------|----------------|---------|
| Segment 1 | 31           | 0.098          | 0.030   |
| Segment 2 | 28           | 0.002          | 0.098   |
| Segment 3 | 28           | 0.170          | <0.001  |

Table S5: Region volume and overlap information. (included as a separate attachment Microsoft excel file)
